# Supplementary material for: Pd-loaded unique urchin-structured Ga2O3 for selective CO2 photoreduction to CH4
Source: Royal Society of Chemistry journal article supplement (doi:10.1039/d4ta04038d), 2024-01-01
Supplement: d4ta04038d1.pdf [file d4ta04038d1.pdf]

## **Pd-loaded unique urchin-structured Ga<sub>2</sub>O<sub>3</sub> for selective CO<sub>2</sub> photoreduction to CH<sub>4</sub>**

**Wei Qiu**<sup>1,2</sup>, **Pengjian Lu**<sup>2,3</sup>, **Xiaoxu Kuang**<sup>1,\*</sup>, **Baowen Li**<sup>4</sup>, **Rong Tu**<sup>1,2</sup>, **Song Zhang**<sup>2,1,\*</sup>

<sup>1</sup> Chaozhou Branch of Chemistry and Chemical Engineering Guangdong Laboratory, Chaozhou 521000, China;

<sup>2</sup> State Key Laboratory of Advanced Technology for Materials Synthesis and Processing, Wuhan University of Technology, Wuhan 430070, China;

<sup>3</sup> Wuhan Tuocai Technology Co., Ltd., 147 Luoshi Road, Wuhan 430070, China;

<sup>4</sup> School of Materials Science and Engineering, Wuhan University of Technology, Wuhan 430070, China.

\* Correspondence: [kuangmeinv@hotmail.com](mailto:kuangmeinv@hotmail.com) (X. K); [kobe@whut.edu.cn](mailto:kobe@whut.edu.cn) (S. Z)

## Experimental section

**Chemicals.** Gallium nitrate hydrate ( $\text{Ga}(\text{NO}_3)_3 \cdot x\text{H}_2\text{O}$ ,  $\geq 99.9\%$ ), Palladium nitrate dihydrate ( $\text{Pd}(\text{NO}_3)_2 \cdot 2\text{H}_2\text{O}$ ,  $\geq 99\%$ ), Hexyl alcohol ( $\text{CH}_3(\text{CH}_2)_5\text{OH}$ ,  $\geq 99\%$ ), Dodecane ( $\text{CH}_3(\text{CH}_2)_{10}\text{CH}_3$ ,  $\geq 99\%$ ), Diethylene glycol ( $(\text{HOCH}_2\text{CH}_2)_2\text{O}$ ,  $\geq 99\%$ ),  $\text{NaBH}_4$  ( $\geq 99\%$ ), Ammonia hydroxide solution (AR), and Hexadecyltrimethyl ammonium bromide (CTAB,  $\geq 99\%$ ). All the chemicals were purchased from Innochem Technology Co., Ltd. (Beijing, China) and used without further purification.

**Synthesis of  $\beta\text{-Ga}_2\text{O}_3$ .** Dissolved 0.612 g of  $\text{Ga}(\text{NO}_3)_3 \cdot x\text{H}_2\text{O}$  in 3 g of deionized water and stirred thoroughly to obtain a gallium nitrate aqueous solution. Then mixed the prepared gallium nitrate solution with 25 mL dodecane, 2.28 g CTAB, and 2.5 mL hexyl alcohol and stirred for 1 hour to obtain mixture A. Mixed 3.612 g of ammonia solution, 25 mL of dodecane, 2.28 g of CTAB, and 2.5 mL of hexyl alcohol and stirred for 1 hour to obtain mixture B. Added mixture B dropwise to mixture A to adjust the pH to 9. Subsequently, an aging reaction was carried out at temperatures of 50, 70, and 90 °C, with an aging time of 9 hours. When the water bath was cooled to room temperature, 80 mL of diethylene glycol was added to the mixed solution. After filtration and washing, the resulting white precipitate was calcined at 900 °C for 3 hours. The calcined products were labeled as  $\text{Ga}_2\text{O}_3\text{-50}$ ,  $\text{Ga}_2\text{O}_3\text{-70}$ , and  $\text{Ga}_2\text{O}_3\text{-90}$ , respectively.

**Synthesis of Pd-loaded  $\beta\text{-Ga}_2\text{O}_3$ .** Typically, dissolved 1 g of  $\text{Ga}_2\text{O}_3\text{-90}$  powder in 50 mL of deionized water and sonicated for 30 minutes, then added a certain amount of  $\text{Pd}(\text{NO}_3)_2 \cdot 2\text{H}_2\text{O}$  to the solution and continued stirring for 1 hour to obtain 1wt%,

2wt%, 3wt%, and 5wt% Pd<sup>2+</sup> solution. Subsequently, NaBH<sub>4</sub> was added to the solution to reduce Pd<sup>2+</sup> to Pd<sup>0</sup>. After filtration and washing, the precipitate was collected and dried in a 60 °C vacuum drying oven for 24 hours. Ga<sub>2</sub>O<sub>3</sub>-90 with Pd loadings of 1%, 2%, 3%, and 5% were labeled as 1%Pd/ Ga<sub>2</sub>O<sub>3</sub>-90, 2%Pd/ Ga<sub>2</sub>O<sub>3</sub>-90, 3%Pd/ Ga<sub>2</sub>O<sub>3</sub>-90, and 5%Pd/ Ga<sub>2</sub>O<sub>3</sub>-90.

### **Characterization.**

The crystal structure of the samples was determined by X-ray diffraction (XRD, Rigaku Ultima III, Rigaku Corporation, Japan). The microstructure and elemental composition were analyzed by field emission scanning electron microscopy (FE-SEM, ZEISS SIGMA 500 FE-SEM, Carl Zeiss AG, Germany) and transmission electron microscopy (TEM, Talos F200S, Thermo Fisher Scientific, U.S.A). The surface chemical composition and chemical bond vibration were characterized by X-ray photoelectron spectroscopy (XPS, ESCALAB 250Xi, Thermo Fisher Scientific, U.S.A) and Fourier-transform infrared (FTIR, Nicolet 6700, Thermo Fisher Scientific, U.S.A). Electron paramagnetic spectroscopy (EPR, Bruker EMXplus, Germany) was performed to characterize the oxygen vacancies in the photocatalysts. Nitrogen adsorption-desorption isotherms were obtained on an ASAP 2020 adsorption analyzer supplied by Micromeritics (ASAP 2020HD88, Micromeritics, U.S.A). The ultraviolet-visible diffuse reflectance spectra (UV-vis DRS) were obtained from a UV-vis spectrophotometer (PerkinElmer Lambda 75, PerkinElmer, U.S.A). Photoluminescence (PL) spectra were collected by the fluorescence spectrometers (Edinburgh FLS980, Edinburgh Instruments, Britain) with an emission wavelength of

280 nm.

**Photoelectrochemical measurements.** 5 mg as-prepared photocatalyst was uniformly dispersed in a 40  $\mu$ L mixed solution (Nafion:ethanol=1:1). Then, the suspension was coated on a 1 cm $\times$ 2 cm indium tin oxide (ITO) glass and dried for 3 hours at a temperature of 50  $^{\circ}$ C. The photoelectrochemical performance was measured by an electrochemical workstation (Chi662D, Shanghai Chenhua, China) with a three-electrode cell. ITO glass, Pt foil and Ag/AgCl were used as the working electrode, counter electrode, and reference electrode, respectively. Moreover, the light source was a 300 W mercury lamp (CELHXF300, Beijing China education Au-light, China) with a power density of 100 mW/cm<sup>2</sup>.

**Photocatalytic CO<sub>2</sub> reduction measurements.** 15 mg of photocatalyst was uniformly dispersed in a 100 mL reactor containing 5 mL of water. Before the CO<sub>2</sub> reduction reaction begins, continuously introduced high purity CO<sub>2</sub> into the reactor for 40 minutes. Then a 300 W mercury lamp was used as the irradiation source to excite the photogenerated electrons of the catalyst. The entire photocatalytic reduction of CO<sub>2</sub> reaction lasted for 8 hours, and 1 mL of gas was extracted from the glass chamber every hour interval to detect. The species and amount of the product were analyzed by gas chromatography (GC-7920-TF2A, Beijing China education Au-light, China) with Ar as the carrier gas. CH<sub>4</sub> was first reduced to CO in the methane reactor, and then the amount of CO was detected by a flame ionization detector (FID) to determine the amount of CH<sub>4</sub> produced during the photocatalytic reaction process. The selectivity of CH<sub>4</sub> was calculated using the following equation:

$$S_{CH_4} = \frac{Y_{CH_4} \times 8}{Y_{CH_4} \times 8 + Y_{CO} \times 2}$$

Where  $S_{CH_4}$  represents the selectivity of  $CH_4$ ,  $Y_{CH_4}$  and  $Y_{CO}$  represents the yields of  $CH_4$  and  $CO$ , respectively. The cyclic experiment was conducted with 15 mg catalyst, and after the  $CO_2$  reduction reaction was completed,  $CO_2$  was refilled again for the reaction. This process was repeated 8 times. The C source for isotope labeling experiments was detected by gaschromatography–mass spectrometry (GC-MS, 7890A and 5975C, Agilent, U.S.A).

**In situ DRIFTS measurements.** The in-situ DRIFTS spectra were collected from a FTIR spectrometer (INVENIO S, Bruker, Germany). Typically, Placed the sample in the reaction chamber and raised temperature to 200 °C and blew the sample with Ar. Collected background baseline after the reaction chamber had cooled to room temperature. Subsequently,  $CO_2$  and  $H_2O$  were introduced under dark conditions, and after adsorption saturation, light was turned on. The data of the spectra were collected at 10, 20, 30, 40, and 50 minutes, respectively.

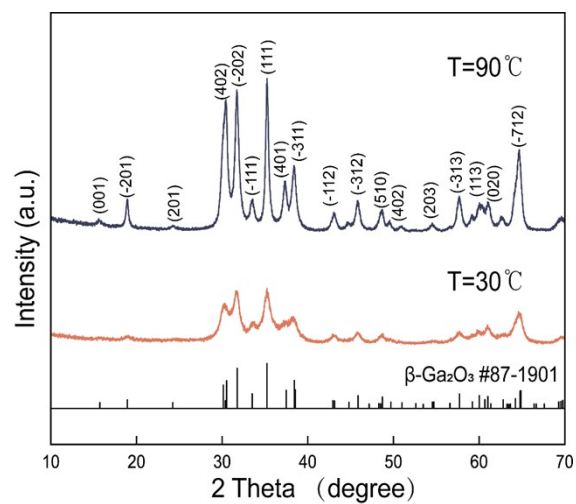

**Fig. S1** XRD patterns of  $\text{Ga}_2\text{O}_3$  synthesized at aging temperatures of 30 and 90°C.

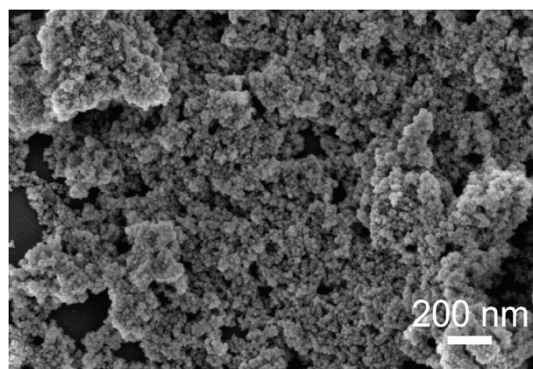

**Fig. S2** SEM image of Ga<sub>2</sub>O<sub>3</sub> synthesized at an aging temperature of 30°C.

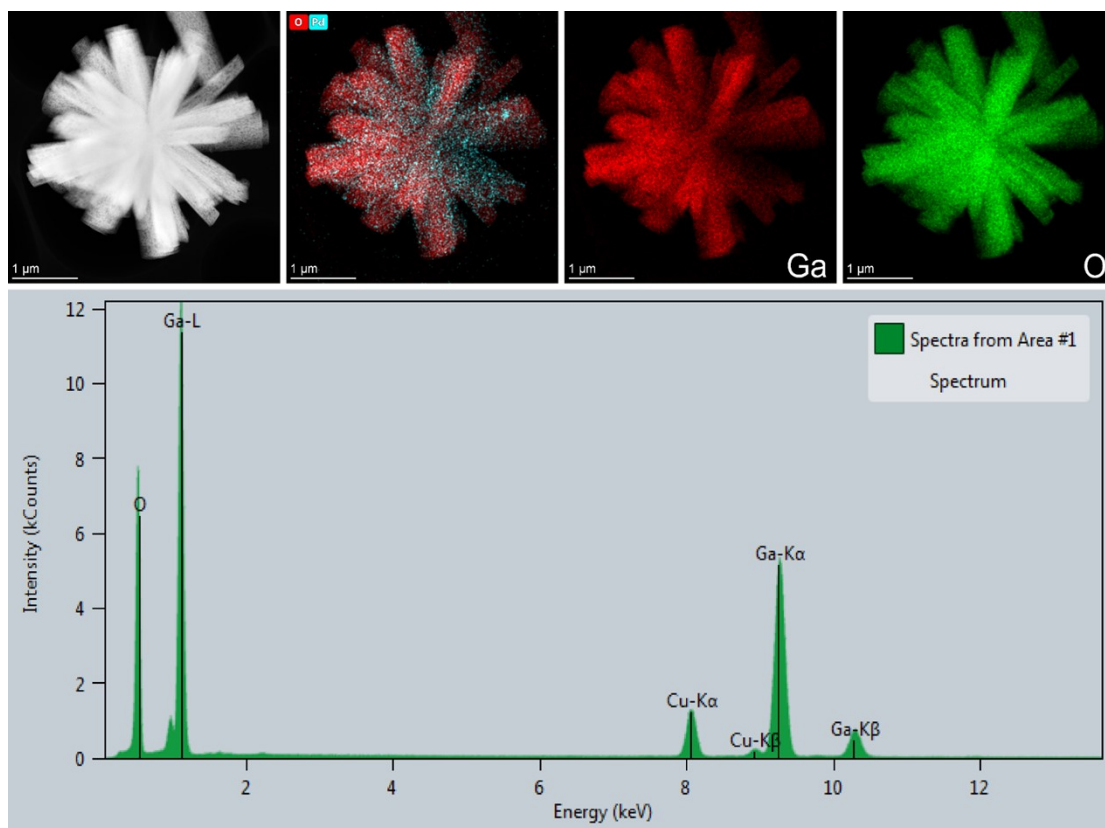

Fig. S3 EDS spectra and elemental mapping of Ga<sub>2</sub>O<sub>3</sub>-90.



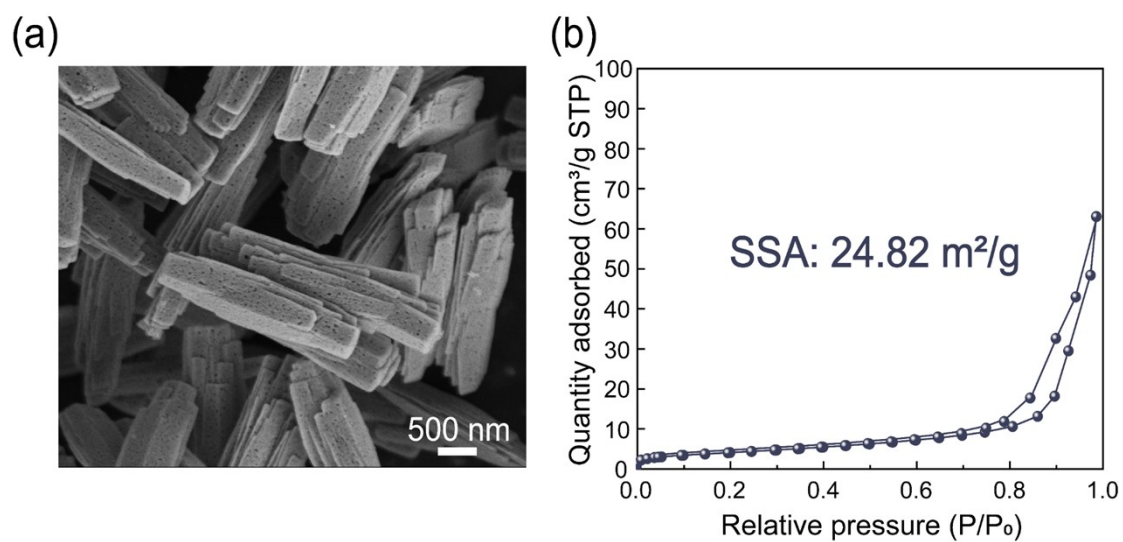

**Fig. S4** (a) SEM image of Ga<sub>2</sub>O<sub>3</sub> prepared at 100 °C; (b) N<sub>2</sub> adsorption–desorption isotherms of Ga<sub>2</sub>O<sub>3</sub> prepared at 100 °C.

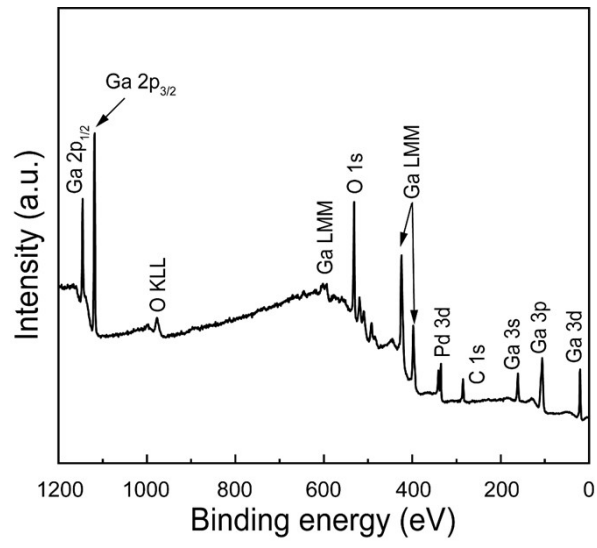

**Fig. S5** XPS survey spectra of 2%Pd/Ga<sub>2</sub>O<sub>3</sub>-90.

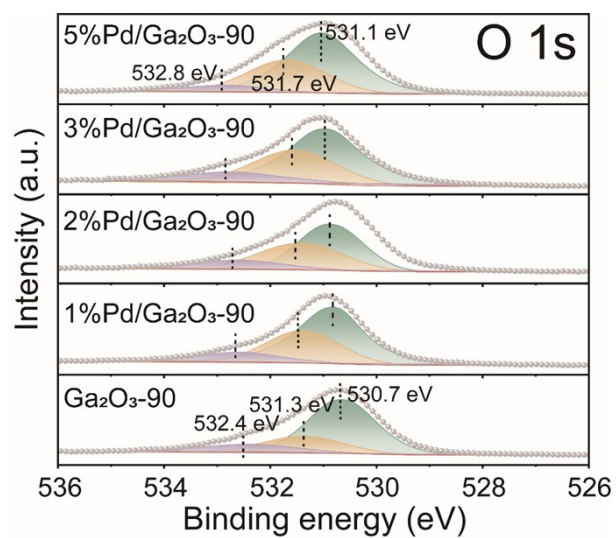

**Fig. S6** O 1s spectrum of the as-prepared samples.

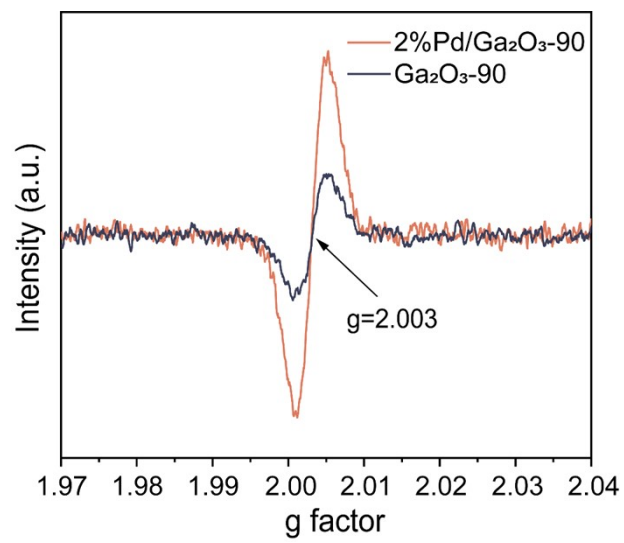

**Fig. S7** EPR spectra of Ga<sub>2</sub>O<sub>3</sub>-90 and 2%Pd/Ga<sub>2</sub>O<sub>3</sub>-90.

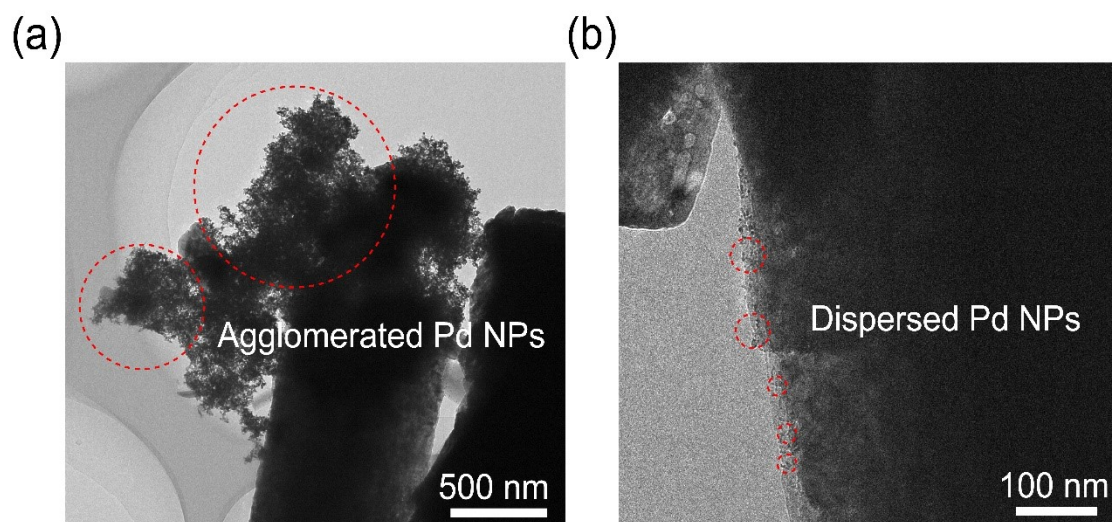

**Fig. S8** TEM images of (a) 5%Pd/Ga<sub>2</sub>O<sub>3</sub>-90; (b) 2%Pd/Ga<sub>2</sub>O<sub>3</sub>-90.

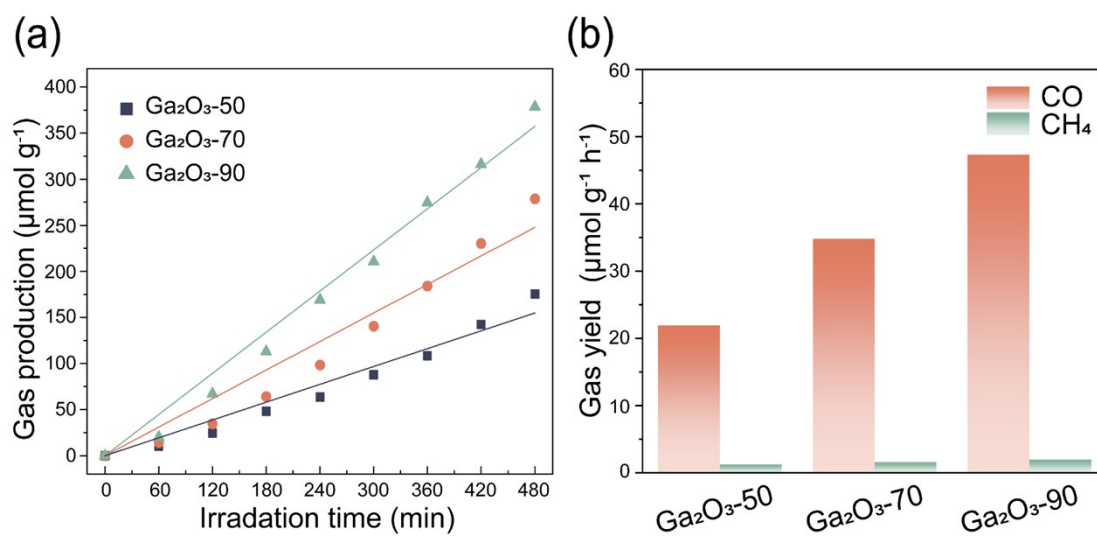

**Fig. S9** (a) CO production of different catalysts; (b) Yield of CO and CH<sub>4</sub> from different catalysts.

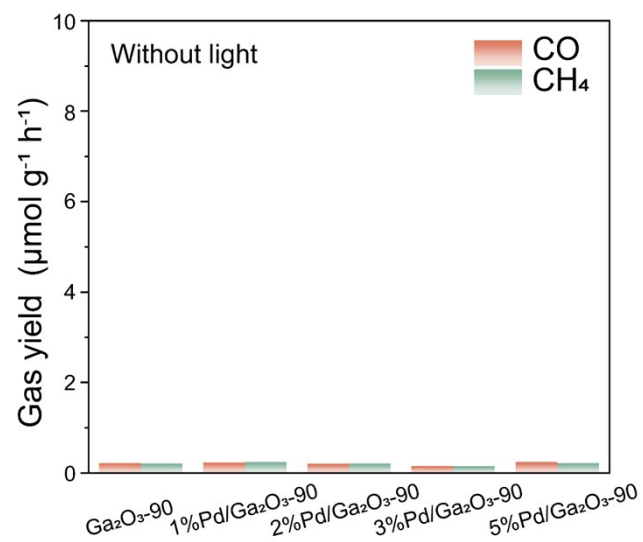

**Fig. S10** CO and CH<sub>4</sub> yield of different catalysts under dark condition.

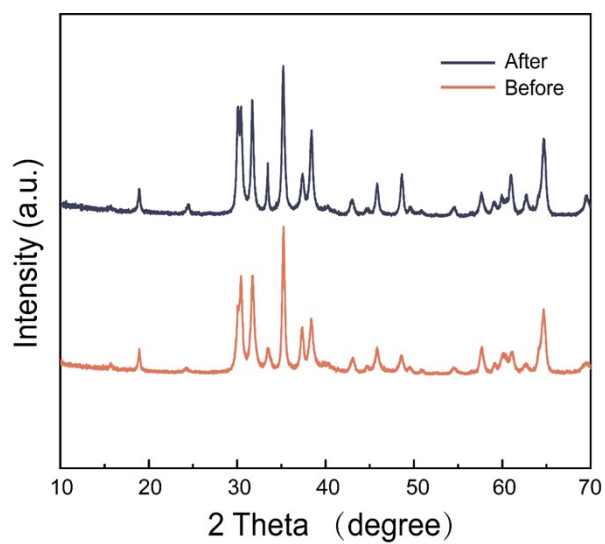

**Fig. S11** XRD patterns of 2%Pd/Ga<sub>2</sub>O<sub>3</sub>-90 before and after reaction.



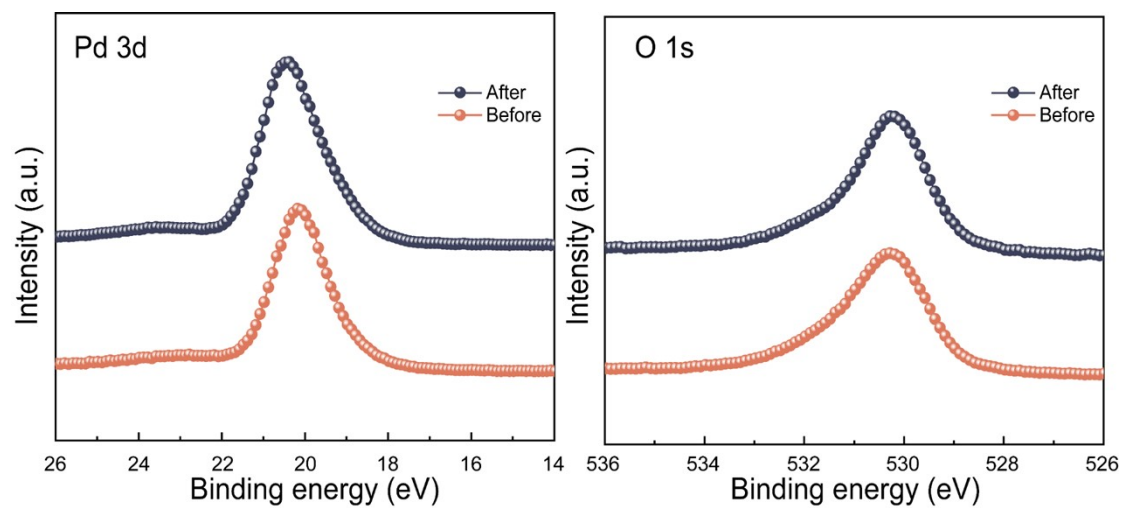

**Fig. S12** XPS spectra of 2%Pd/Ga<sub>2</sub>O<sub>3</sub>-90 before and after reaction.

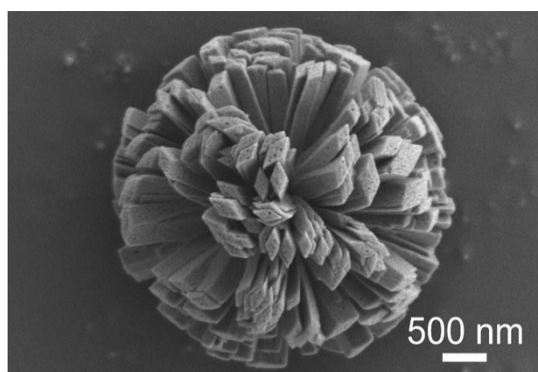

**Fig. S13** SEM image of 2%Pd/Ga<sub>2</sub>O<sub>3</sub>-90 after reaction.

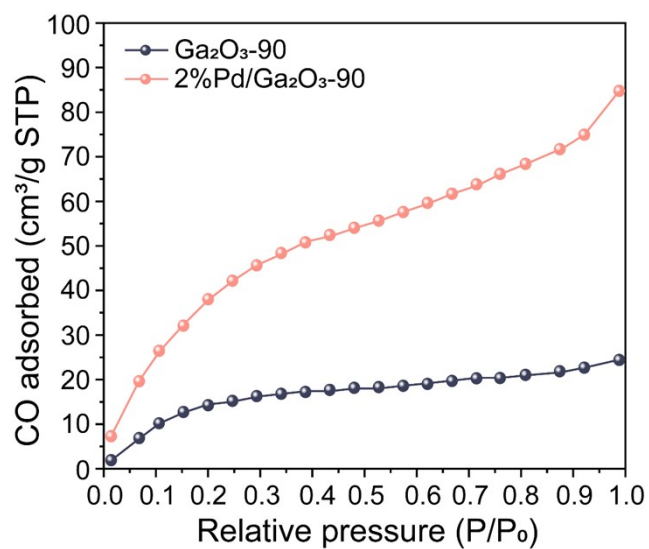

**Fig S14** CO adsorption isotherms of Ga<sub>2</sub>O<sub>3</sub>-90 and 2%Pd/Ga<sub>2</sub>O<sub>3</sub>-90.

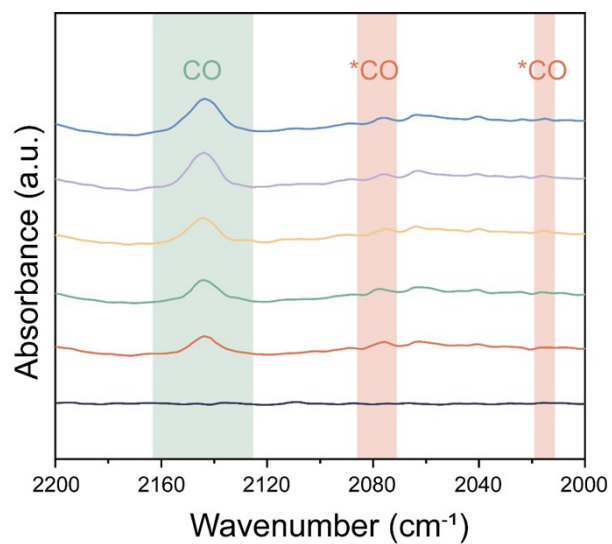

**Fig S15** In situ DRIFTS spectra of Ga<sub>2</sub>O<sub>3</sub>-90 within the range of 2000-2200 cm<sup>-1</sup>.

**Table S1 BET surface area of Ga<sub>2</sub>O<sub>3</sub>-50, Ga<sub>2</sub>O<sub>3</sub>-70, and Ga<sub>2</sub>O<sub>3</sub>-90.**

| Sample                                    | Ga <sub>2</sub> O <sub>3</sub> -50 | Ga <sub>2</sub> O <sub>3</sub> -70 | Ga <sub>2</sub> O <sub>3</sub> -90 |
|-------------------------------------------|------------------------------------|------------------------------------|------------------------------------|
| Specific surface area (m <sup>2</sup> /g) | 22.4                               | 32.8                               | 44.7                               |

**Table S2 Fitting results of  $\tau_1$  and  $\tau_2$  for the decay curves under a 260 nm excitation (ns).**

| Sample                                  | $A_1$    | $A_2$    | $\tau_1$ | $\tau_2$ | Average lifetime |
|-----------------------------------------|----------|----------|----------|----------|------------------|
| Ga <sub>2</sub> O <sub>3</sub> -90      | 808.9095 | 210.1370 | 0.9984   | 7.2251   | 2.107            |
| 1%Pd/Ga <sub>2</sub> O <sub>3</sub> -90 | 933.6121 | 216.1265 | 0.9246   | 3.7483   | 3.462            |
| 2%Pd/Ga <sub>2</sub> O <sub>3</sub> -90 | 779.1401 | 259.1584 | 0.7769   | 3.1076   | 5.062            |
| 3%Pd/Ga <sub>2</sub> O <sub>3</sub> -90 | 883.2717 | 249.1115 | 1.0928   | 4.8018   | 3.145            |
| 5%Pd/Ga <sub>2</sub> O <sub>3</sub> -90 | 766.2424 | 208.8765 | 0.9103   | 5.1202   | 2.297            |
